# Supplementary material for: Systematic Literature Review and Meta-Analysis on the Clinical Outcomes of Spine Surgeries in Patients with Concurrent Osteoporosis
Source: PubMed Central journal article supplement — Spine Surg Relat Res. 2023 Jan 12;7(3):200–10. doi: 10.22603/ssrr.2022-0198 (PMC10257961; doi:10.22603/ssrr.2022-0198), 2023-01-12
Supplement: 2432-261X-7-0200-s002.pdf [file 2432-261X-7-0200-s002.pdf]

**Table S2: Johns Hopkins Nursing Evidence-Based Practice: Evidence Levels<sup>22</sup>**

| Evidence Levels                                                                                                                                                                                                                                                                                                                                                          | Quality Guides                                                                                                                                                                                                                                                                                          |
|--------------------------------------------------------------------------------------------------------------------------------------------------------------------------------------------------------------------------------------------------------------------------------------------------------------------------------------------------------------------------|---------------------------------------------------------------------------------------------------------------------------------------------------------------------------------------------------------------------------------------------------------------------------------------------------------|
| <p><b>Level 1</b><br/>           Experimental or Interventional study—<b>Randomized controlled trial (RCT)</b><br/>           Systematic review of RCTs, with or without meta-analysis</p>                                                                                                                                                                               | <p><b>A <u>High quality</u>:</b> Consistent, generalizable results; sufficient sample size for the study design; adequate control; definitive conclusions; consistent recommendations based on comprehensive literature review that includes thorough reference to scientific evidence</p>              |
| <p><b>Level 2</b><br/>           Quasi-experimental study—<b>Nonrandomized intervention studies or non-RCT</b><br/>           Systematic review of a combination of RCTs and quasi-experimental, or quasi-experimental studies only, with or without meta-analysis</p>                                                                                                   | <p><b>B <u>Good quality</u>:</b> Reasonably consistent results; sufficient sample size for the study design; some control, fairly definitive conclusions; reasonably consistent recommendations based on fairly comprehensive literature review that includes some reference to scientific evidence</p> |
| <p><b>Level 3</b><br/>           Non-experimental/interventional study—<b>Observational study</b><br/>           Systematic review of a combination of RCTs, quasi-experimental and non-experimental studies, or non-experimental studies only, with or without meta-analysis<br/>           Qualitative study or systematic review with or without a meta-synthesis</p> | <p><b>C <u>Low quality or major flaws</u>:</b> Little evidence with inconsistent results; insufficient sample size for the study design; conclusions cannot be drawn</p>                                                                                                                                |
